# Supplementary material for: Observation of enhanced photocurrent response in M–CuInS2(M = Au, Ag) heteronanostructures: phase selective synthesis and application
Source: Royal Society of Chemistry journal article supplement (doi:10.1039/c6nj02439d), 2016-12-09
Supplement: c6nj02439d1.pdf [file c6nj02439d1.pdf]

## Electronic Supplementary information†

### **Observation of enhanced photocurrent response in M-CuInS<sub>2</sub> (M = Au, Ag) heteronanostructures: phase selective synthesis and application**

Abhisek Brata Ghosh,<sup>a</sup> Namrata Saha,<sup>a</sup> Arpita Sarkar,<sup>a</sup> Amit Kumar Dutta,<sup>a</sup> Swarup Kumar Maji,<sup>a</sup> and Bibhutosha Adhikary<sup>\*a</sup>

<sup>a</sup>Department of Chemistry, Indian Institute of Engineering Science and Technology, Shibpur, Howrah 711 103, West Bengal, India

\*Corresponding author Tel: +91-3326684561 Ext. 512, Fax: +91-3326682916,

E-mail: [bibhutoshadhikary@yahoo.in](mailto:bibhutoshadhikary@yahoo.in)

**Table S1** Crystallographic data for In(acda)<sub>3</sub> (**1**) and Cu(PPh<sub>3</sub>)<sub>2</sub>(acda) (**2**).

|                                                      | In(acda) <sub>3</sub> ( <b>1</b> )                                   | Cu(PPh <sub>3</sub> ) <sub>2</sub> (acda)( <b>2</b> )                |
|------------------------------------------------------|----------------------------------------------------------------------|----------------------------------------------------------------------|
| Empirical formula                                    | C <sub>18</sub> H <sub>24</sub> InN <sub>3</sub> S <sub>6</sub>      | C <sub>42</sub> H <sub>38</sub> CuNP <sub>2</sub> S <sub>2</sub>     |
| Formula weight                                       | 589.58                                                               | 746.33                                                               |
| <i>T</i> , K                                         | 120(2)                                                               | 120(2)                                                               |
| Crystal system                                       | Triclinic                                                            | Triclinic                                                            |
| Space group                                          | <i>P</i> -1                                                          | <i>P</i> -1                                                          |
| <i>a</i> / Å                                         | 11.906(5)                                                            | 10.610(7)                                                            |
| <i>b</i> / Å                                         | 13.462(5)                                                            | 12.954(8)                                                            |
| <i>c</i> / Å                                         | 15.476(5)                                                            | 14.539(9)                                                            |
| $\alpha$ / deg                                       | 69.790(5)                                                            | 84.106(2)                                                            |
| $\beta$ / deg                                        | 83.070(5)                                                            | 72.903(2)                                                            |
| $\gamma$ / deg                                       | 89.517(5)                                                            | 72.028(2)                                                            |
| <i>V</i> / Å <sup>3</sup>                            | 2309.3(15)                                                           | 1816.5(2)                                                            |
| <i>Z</i>                                             | 4                                                                    | 2                                                                    |
| $\mu$ , mm <sup>-1</sup>                             | 1.577                                                                | 0.836                                                                |
| $\lambda$ , Å                                        | 0.71073                                                              | 0.71073                                                              |
| <i>F</i> (000)                                       | 1192                                                                 | 776                                                                  |
| Crystal size, mm <sup>3</sup>                        | 0.27 × 0.16 × 0.08                                                   | 0.20 × 0.18 × 0.16                                                   |
| <i>D</i> <sub>calc</sub> / g cm <sup>-3</sup>        | 1.696                                                                | 1.365                                                                |
| No. of data/ restraints /params                      | 32181/ 133 / 490                                                     | 6386/ 1/ 441                                                         |
| No. of reflns [ <i>I</i> > 2σ ( <i>I</i> )]          | 10325                                                                | 6386                                                                 |
| GOF on <i>F</i> <sup>2</sup>                         | 1.031                                                                | 1.023                                                                |
| Final <i>R</i> indices [ <i>I</i> > 2σ ( <i>I</i> )] | R1 <sup><i>a</i></sup> = 0.0358,<br>wR2 <sup><i>b</i></sup> = 0.0768 | R1 <sup><i>a</i></sup> = 0.0452,<br>wR2 <sup><i>b</i></sup> = 0.1171 |
| <i>R</i> indices (all data)                          | R1 <sup><i>a</i></sup> = 0.0515,<br>wR2 <sup><i>b</i></sup> = 0.0827 | R1 <sup><i>a</i></sup> = 0.0702,<br>wR2 <sup><i>b</i></sup> = 0.1403 |

**Table S2** Selected Interatomic Distances (Å) for the complex In(acda)<sub>3</sub> (1) and Cu(PPh<sub>3</sub>)<sub>2</sub>(acda)

(2).

| In(acda) <sub>3</sub> (1) |          | Cu(PPh <sub>3</sub> ) <sub>2</sub> (acda) (2) |          |
|---------------------------|----------|-----------------------------------------------|----------|
| In(1)–S(2)                | 2.572(2) | Cu–P(1)                                       | 2.271(1) |
| In(1)–S(3)                | 2.575(1) | Cu–P(2)                                       | 2.260(1) |
| In(1)–S(6)                | 2.619(1) | Cu–S(1)                                       | 2.449(1) |
| In(1)–S(7)                | 2.574(1) | Cu–S(2)                                       | 2.382(2) |
| In(1)–S(8)                | 2.570(2) |                                               |          |
| In(1)–S(9)                | 2.673(1) |                                               |          |
| In(2)–S(11)               | 2.588(2) |                                               |          |
| In(2)–S(12)               | 2.592(2) |                                               |          |
| In(2)–S(14)               | 2.623(2) |                                               |          |
| In(2)–S(15)               | 2.589(1) |                                               |          |
| In(2)–S(17)               | 2.588(1) |                                               |          |
| In(2)–S(18)               | 2.623(1) |                                               |          |

**Table S3** Selected Bond Angles (deg) for the complex In(acda)<sub>3</sub> (**1**) and Cu(PPh<sub>3</sub>)<sub>2</sub>(acda) (**2**).

| In(acda) <sub>3</sub> ( <b>1</b> ) |           | Cu(PPh <sub>3</sub> ) <sub>2</sub> (acda) ( <b>2</b> ) |           |
|------------------------------------|-----------|--------------------------------------------------------|-----------|
| S(2)–In(1)–S(3)                    | 70.11(3)  | P(1)–Cu–P(2)                                           | 123.67(4) |
| S(2)–In(1)–S(6)                    | 101.78(3) | P(1)–Cu–S(1)                                           | 106.76(4) |
| S(2)–In(1)–S(7)                    | 109.56(3) | P(1)–Cu–S(2)                                           | 111.58(4) |
| S(2)–In(1)–S(8)                    | 152.68(3) | P(2)–Cu–S(1)                                           | 108.89(4) |
| S(2)–In(1)–S(9)                    | 89.32(3)  | P(2)–Cu–S(2)                                           | 119.32(4) |
| S(3)–In(1)–S(6)                    | 165.71(3) | S(1)–Cu–S(2)                                           | 73.95(4)  |
| S(3)–In(1)–S(7)                    | 101.86(3) |                                                        |           |
| S(3)–In(1)–S(8)                    | 95.81(3)  |                                                        |           |
| S(3)–In(1)–S(9)                    | 96.27(3)  |                                                        |           |
| S(6)–In(1)–S(7)                    | 69.15(3)  |                                                        |           |
| S(6)–In(1)–S(8)                    | 96.17(3)  |                                                        |           |
| S(6)–In(1)–S(9)                    | 95.34(3)  |                                                        |           |
| S(7)–In(1)–S(8)                    | 95.96(3)  |                                                        |           |
| S(7)–In(1)–S(9)                    | 157.31(3) |                                                        |           |
| S(8)–In(1)–S(9)                    | 68.49(3)  |                                                        |           |
| S(11)–In(2)–S(12)                  | 69.11(3)  |                                                        |           |
| S(11)–In(2)–S(14)                  | 87.24(4)  |                                                        |           |
| S(11)–In(2)–S(15)                  | 100.71(3) |                                                        |           |
| S(11)–In(2)–S(17)                  | 99.21(3)  |                                                        |           |
| S(11)–In(2)–S(18)                  | 165.06(3) |                                                        |           |
| S(12)–In(2)–S(14)                  | 149.42(3) |                                                        |           |
| S(12)–In(2)–S(15)                  | 96.07(3)  |                                                        |           |
| S(12)–In(2)–S(17)                  | 110.41(3) |                                                        |           |
| S(12)–In(2)–S(18)                  | 105.67(3) |                                                        |           |
| S(14)–In(2)–S(15)                  | 68.73(3)  |                                                        |           |
| S(14)–In(2)–S(17)                  | 91.77(3)  |                                                        |           |
| S(14)–In(2)–S(18)                  | 101.79(3) |                                                        |           |
| S(15)–In(2)–S(17)                  | 151.20(3) |                                                        |           |
| S(15)–In(2)–S(18)                  | 93.70(3)  |                                                        |           |
| S(17)–In(2)–S(18)                  | 68.94(3)  |                                                        |           |

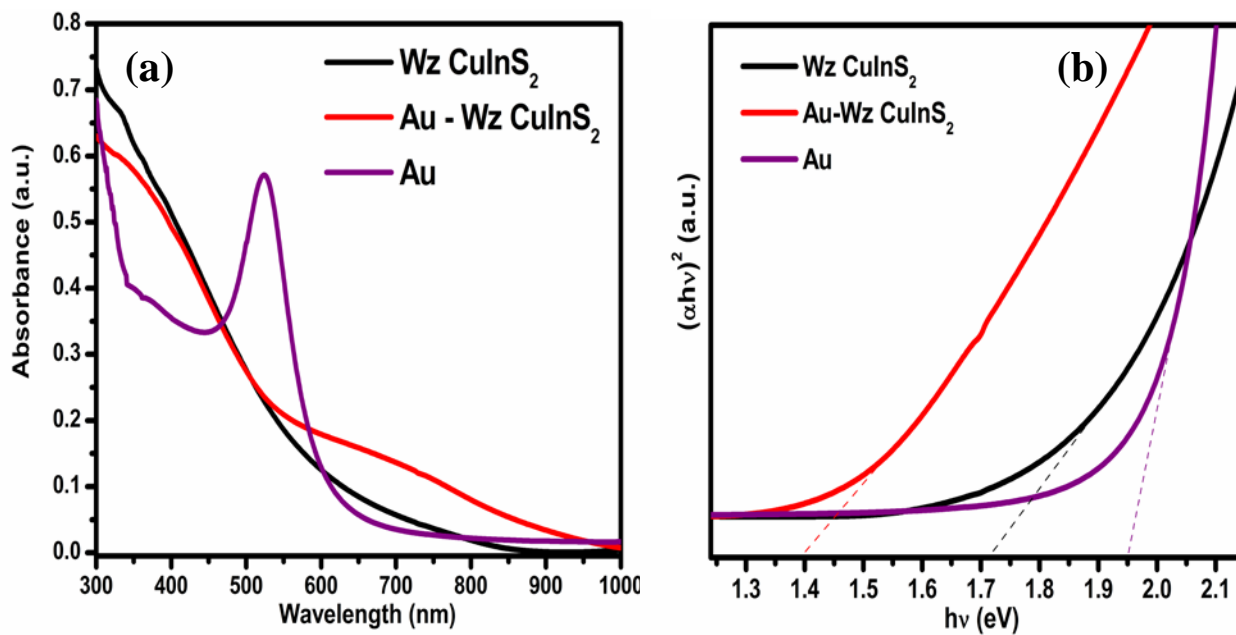

**Fig. S1** (a) Absorption spectra of pure Au nanoparticle, pure Wz CuInS<sub>2</sub> and Au-Wz CuInS<sub>2</sub> heterostructure. (b) Corresponding Tauc's plot.

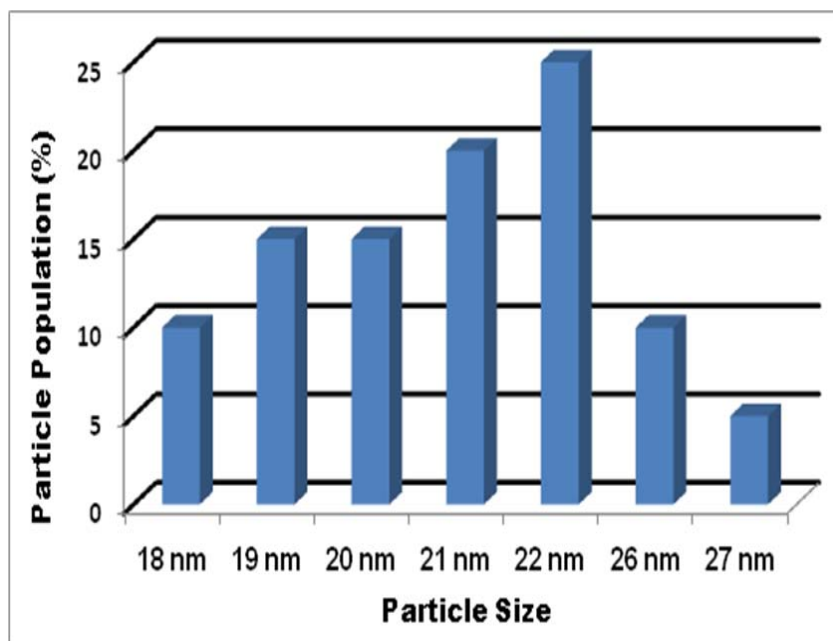

**Fig. S2** Particle size distribution plot for Wz CuInS<sub>2</sub> nanoparticles. Size varies in the range of 18-27 nm.

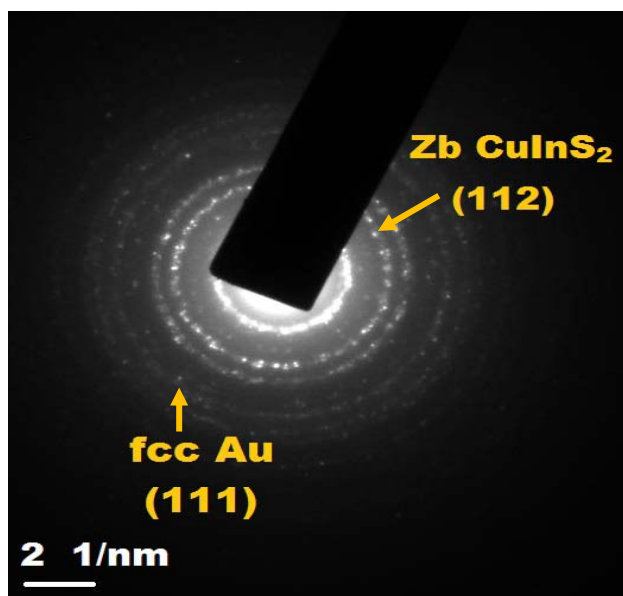

**Fig. S3** SAED pattern of Au-CuInS<sub>2</sub> (Zb). (112) plane of Zb CuInS<sub>2</sub> and (111) plane of fcc Au coexists.

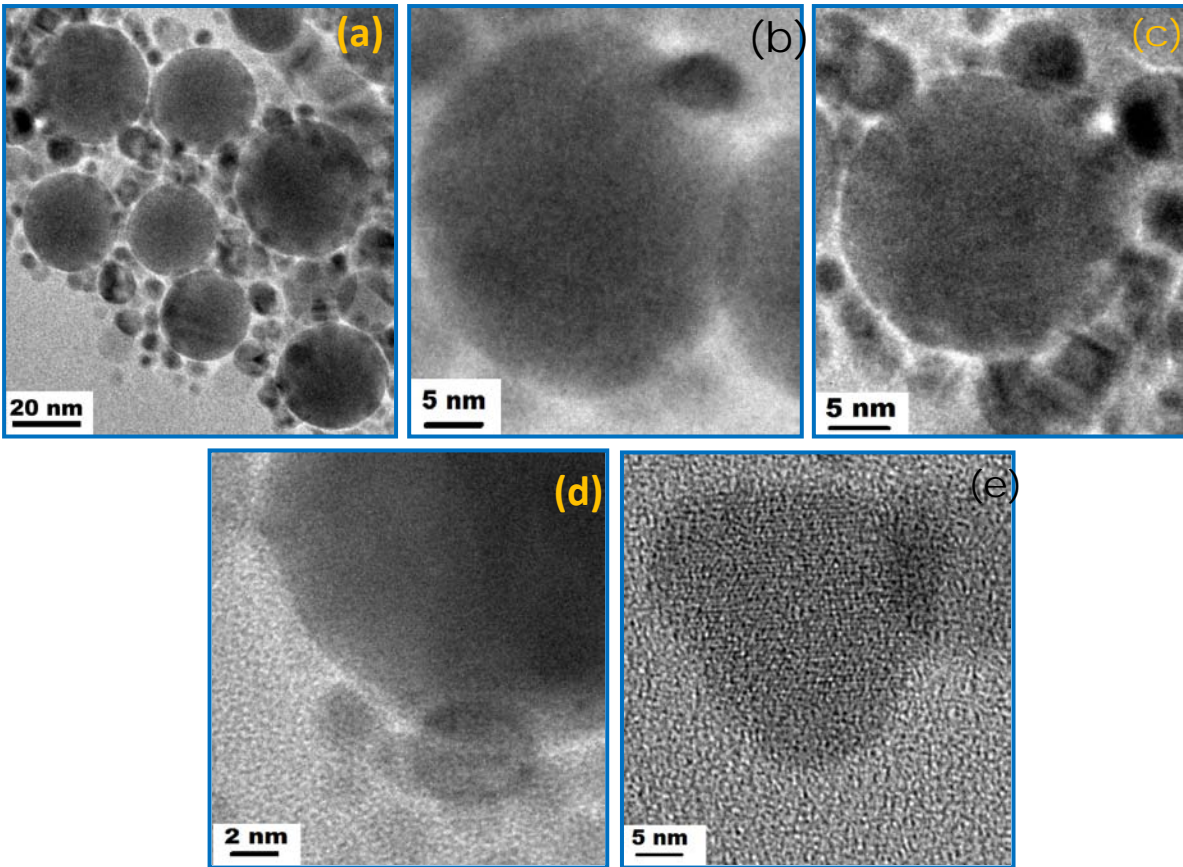

**Fig. S4** (a) TEM image of Ag-Wz CuInS<sub>2</sub> heterostructure. (b) TEM image of a single Ag-Wz CuInS<sub>2</sub> heterostructure. (c) TEM image of a single Ag-Wz CuInS<sub>2</sub> heterostructure indicating haphazard decoration of silver. (d) HRTEM image of Ag-Wz CuInS<sub>2</sub>. (e) HRTEM image of a single Ag-Zb CuInS<sub>2</sub>.

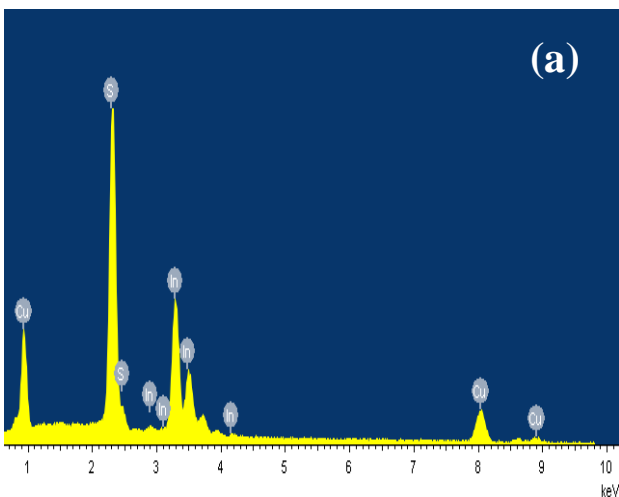

| Element | Weight% | Atomic% |
|---------|---------|---------|
| S       | 25.35   | 48.88   |
| Cu      | 25.28   | 24.63   |
| In      | 49.37   | 26.49   |
| Totals  | 100.00  |         |

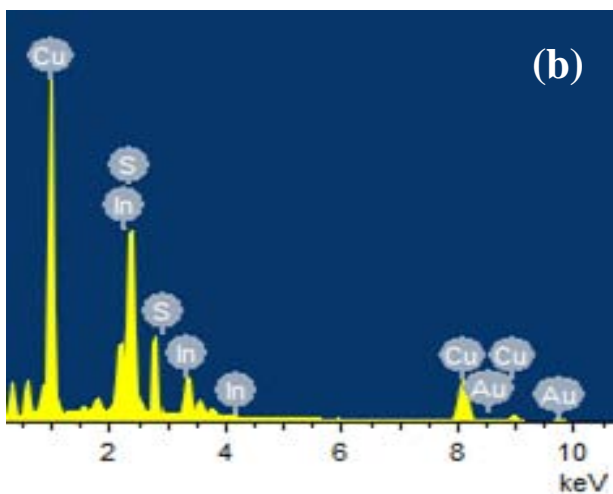

| Element | Weight% | Atomic% |
|---------|---------|---------|
| S       | 20.98   | 45.31   |
| Cu      | 23.30   | 25.34   |
| In      | 38.99   | 23.50   |
| Au      | 16.73   | 5.85    |
| Totals  | 100.00  |         |

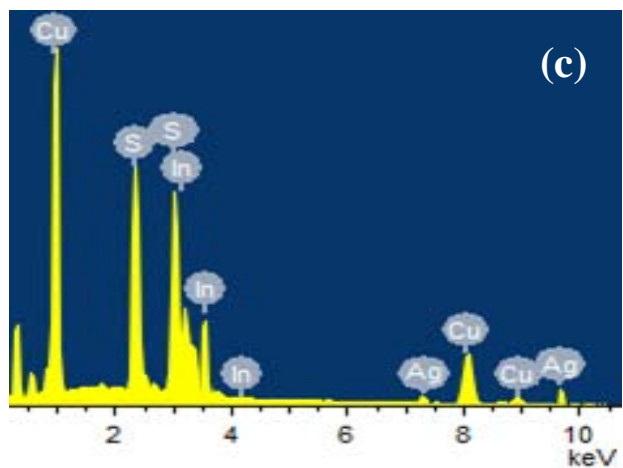

| Element | Weight% | Atomic% |
|---------|---------|---------|
| S       | 24.07   | 47.16   |
| Cu      | 24.12   | 24.06   |
| In      | 43.61   | 23.87   |
| Ag      | 8.20    | 4.91    |
| Totals  | 100.00  |         |

**Fig. S5** EDX spectra of (a)  $\text{CuInS}_2$ , (b) Au-Wz  $\text{CuInS}_2$ , (c) Ag-Wz  $\text{CuInS}_2$  (left panel) and corresponding atomic percentage in tabular form (right panel).



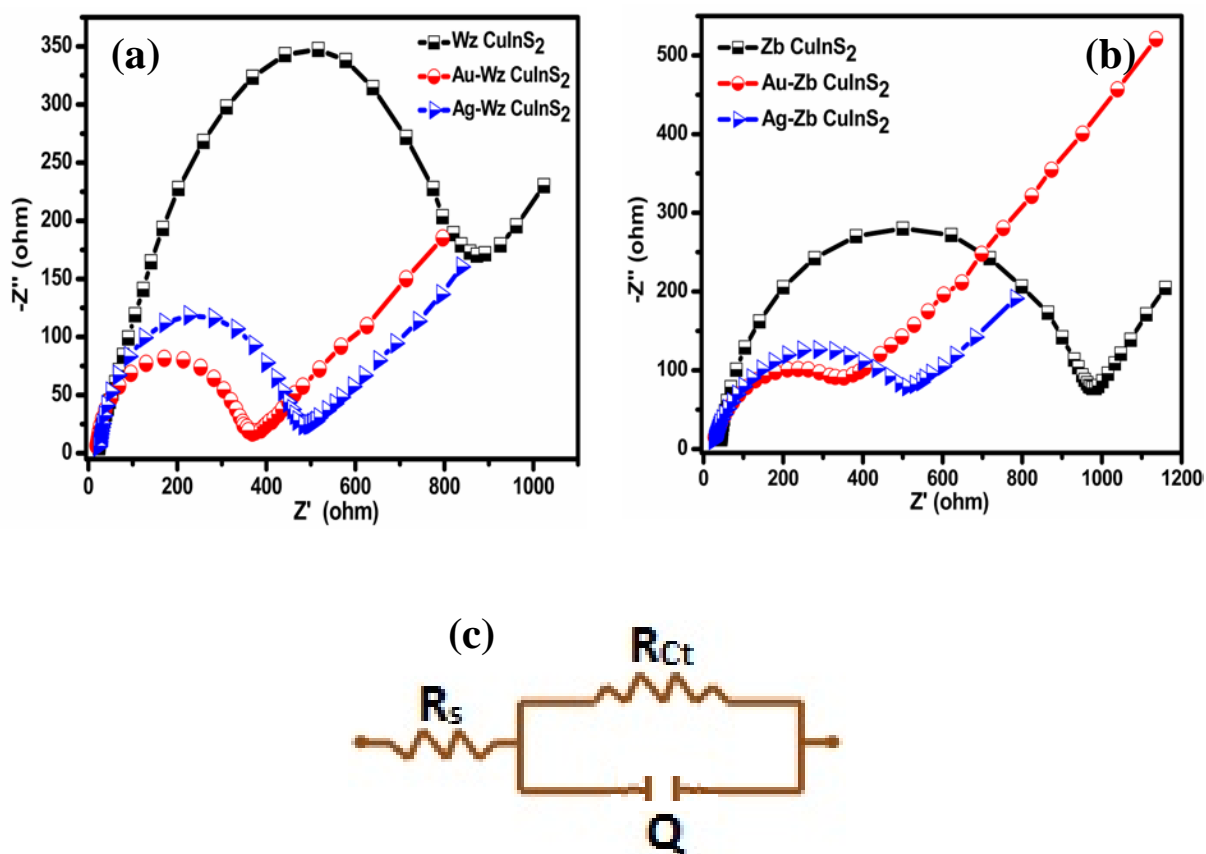

**Fig. S6** Nyquist plot of CuInS<sub>2</sub>, Au-CuInS<sub>2</sub> and Ag-CuInS<sub>2</sub> in (a) Wurtzite and (b) Zinc blende phases. (c) Corresponding equivalent circuit diagram to calculate different impedance parameters.

**Table S4** Variation of impedance parameters of CuInS<sub>2</sub>, Au- CuInS<sub>2</sub> and Ag- CuInS<sub>2</sub> in Wz and Zb phases obtained from the equivalent circuit fitting

| <b>Sample</b>                  | <b><math>R_s</math> (ohm)</b> | <b><math>R_{Ct}</math> (ohm)</b> |
|--------------------------------|-------------------------------|----------------------------------|
| <b>Wz-CuInS<sub>2</sub></b>    | <b>23.0</b>                   | <b>904</b>                       |
| <b>Au-Wz-CuInS<sub>2</sub></b> | <b>12.8</b>                   | <b>357</b>                       |
| <b>Ag-Wz-CuInS<sub>2</sub></b> | <b>18.6</b>                   | <b>470</b>                       |
| <b>Zb-CuInS<sub>2</sub></b>    | <b>40.4</b>                   | <b>987</b>                       |
| <b>Au-Zb-CuInS<sub>2</sub></b> | <b>14.4</b>                   | <b>466</b>                       |
| <b>Ag-Zb-CuInS<sub>2</sub></b> | <b>19.6</b>                   | <b>576</b>                       |

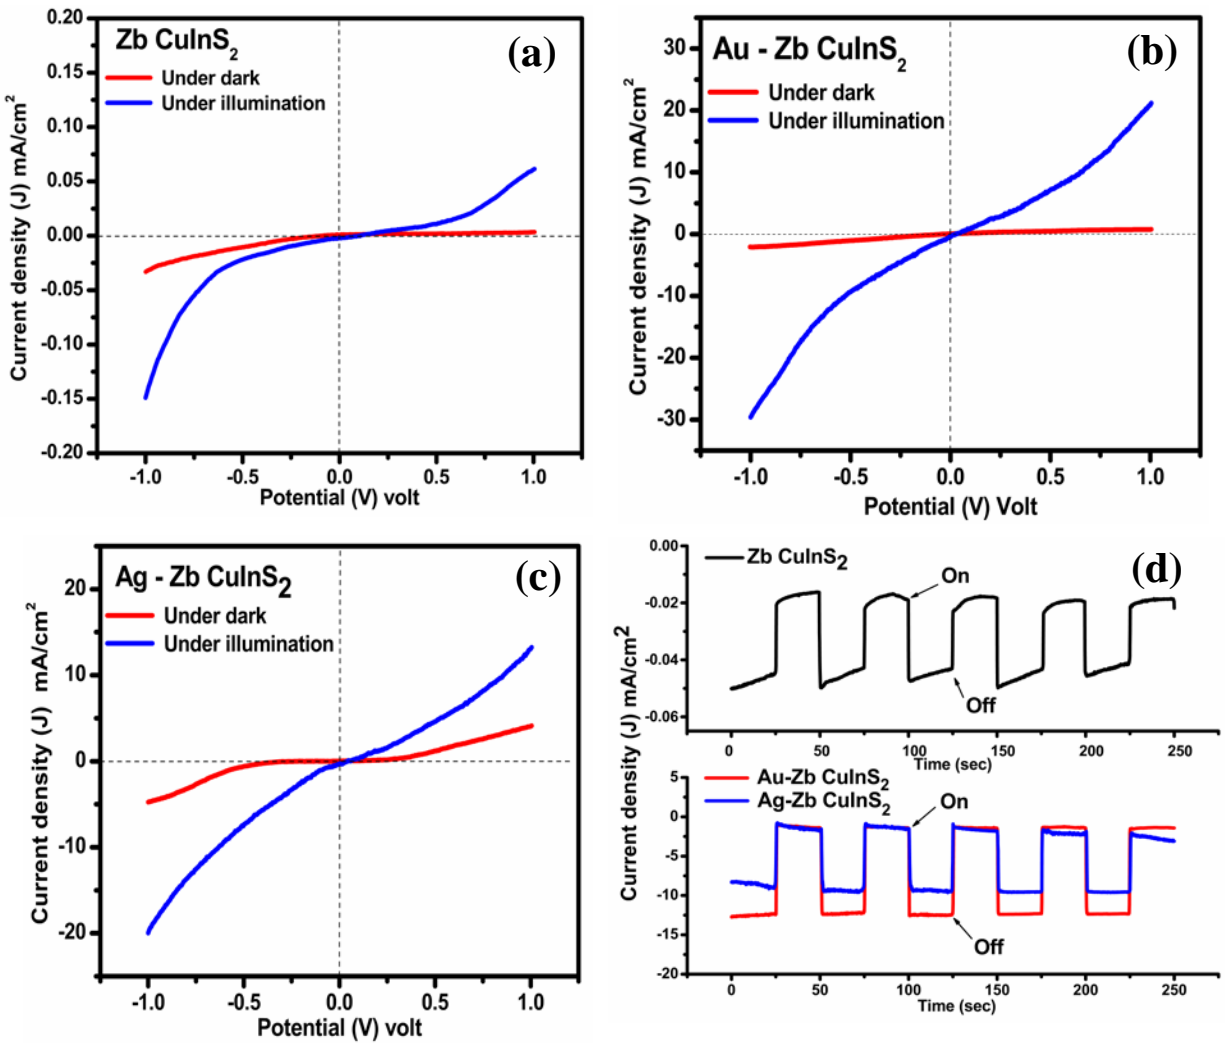

**Fig. S7** Current density versus voltage plots for (a) Zb CuInS<sub>2</sub>, (b) Au- Zb CuInS<sub>2</sub> and (c) Ag- Zb CuInS<sub>2</sub> (Zb) under dark and under illuminations. (d) Current density versus time plots during successive on and off cycles of light for Zb CuInS<sub>2</sub>, Au- Zb CuInS<sub>2</sub> and Ag- Zb CuInS<sub>2</sub> at -0.61 V vs Ag/AgCl.

**Table S5** Summary of photocurrent data of pure and heterostructured CuInS<sub>2</sub>

| Sample                   | Current density under illumination at 0 V vs RHE (mA/cm <sup>2</sup> ) | I <sub>light</sub> /I <sub>dark</sub> |
|--------------------------|------------------------------------------------------------------------|---------------------------------------|
| Wz-CuInS <sub>2</sub>    | -0.063                                                                 | 3.4                                   |
| Au-Wz-CuInS <sub>2</sub> | -13.38                                                                 | 10.1                                  |
| Ag-Wz-CuInS <sub>2</sub> | -10.51                                                                 | 8.4                                   |
| Zb-CuInS <sub>2</sub>    | -0.031                                                                 | 3.1                                   |
| Au-Zb-CuInS <sub>2</sub> | -12.24                                                                 | 9.4                                   |
| Ag-Zb-CuInS <sub>2</sub> | -9.68                                                                  | 7.2                                   |

**Table S6** Comparison of the photocurrent data between the CuInS<sub>2</sub> based heterostructures available in literature and the data obtained in present report

| Sample                                      | Current density under illumination at 0 V vs RHE (mA/cm <sup>2</sup> ) | Reference |
|---------------------------------------------|------------------------------------------------------------------------|-----------|
| Pt/CdS/CuInS <sub>2</sub>                   | -6.0                                                                   | 1         |
| Pt/CdS/Cu(In,Ga)S <sub>2</sub>              | -6.8                                                                   | 2         |
| CuInS <sub>2</sub> /CdS/ZnS                 | -0.04                                                                  | 3         |
| Pt/TiO <sub>2</sub> /CdS/CuInS <sub>2</sub> | -13.0                                                                  | 4         |
| Au-Wz-CuInS <sub>2</sub>                    | -13.38                                                                 | Our Study |

## References

- (1) S Ikeda, T. Nakamura, S. M. Lee, T. Yagi, T. Harada, T. Minegishi, M. Matsumura, *ChemSusChem.*, 2011, **4**, 262-268.
- (2) W.Septina,; Gunawan; S. Ikeda, T. Harada, M. Higashi, R. Abe, M. Matsumura, *J. Phys. Chem. C.*, 2015, **119**, 8576-8583.
- (3) W. Yang, Y. Oh, J. Kim, H. Shin.; J. Moon, *ACS. Appl. Mater. Interfaces.*, 2016, **8**, 425-431.
- (4) J. Zhao, T. Minegishi, L. Zhang, M. Zhong, Gunawan, M. Nakabayashi, G. Ma, T. Hisatomi, M. Katayama, S. Ikeda, N. Shibata, T. Yamada, K. Domen, *Angew. Chem., Int. Ed.*, 2014, **53**, 11808-11812.
